# Supplementary material for: lncRNAs–mRNAs Co–Expression Network Underlying Childhood B–Cell Acute Lymphoblastic Leukaemia: A Pilot Study
Source: PubMed Central journal article supplement (PMC7564554; doi:10.3390/cancers12092489), 2020-09-02
Supplement: cancers-12-02489-s001.pdf [file cancers-12-02489-s001.pdf]

Article

# lncRNAs–mRNAs co–Expression Network Underlying Childhood B–Cell Acute Lymphoblastic Leukaemia: A Pilot Study

Ornella Affinito, Katia Pane, Giovanni Smaldone, Francesca Maria Orlandella, Peppino Mirabelli, Giuliana Beneduce, Rosanna Parasole, Mimmo Ripaldi, Marco Salvatore and Monica Franzese

Supplementary Materials

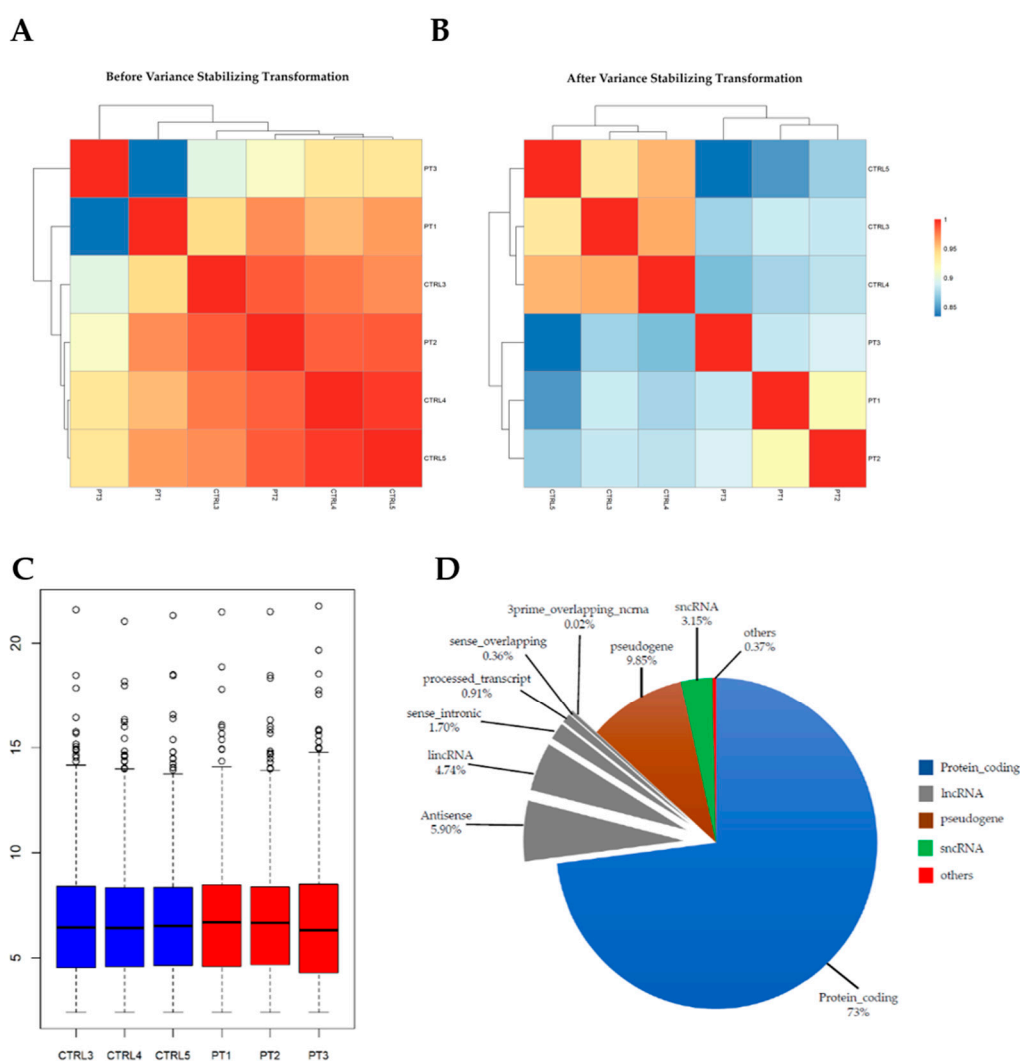

**Figure S1.** lncRNAs expression level and library composition. (A) Heatmap with hierarchical clustering using raw RNA expression levels and (B) normalized RNA–seq expression levels. Samples cluster together by sample group after variance stabilizing transformation. The colour scale indicates the degree of correlation (white–blue, low correlation; orange–red, strong correlation). (C) Boxplots show the distribution of expression levels after variance stabilizing transformation (vst) in each one of the samples. Healthy subjects are in blue and B–ALL patients are in red. (D) Pie chart of the distribution of detected genes into five summarized transcript types as indicated by Ensembl

BioMart databank GRCh37.p13, expressed in percentages. LncRNAs are further divided into the following classes: antisense, long intergenic ncRNAs (lncRNAs), processed transcripts, sense-intronic and sense-overlapping (sense) and 3' overlapping non coding rna (ncrna).

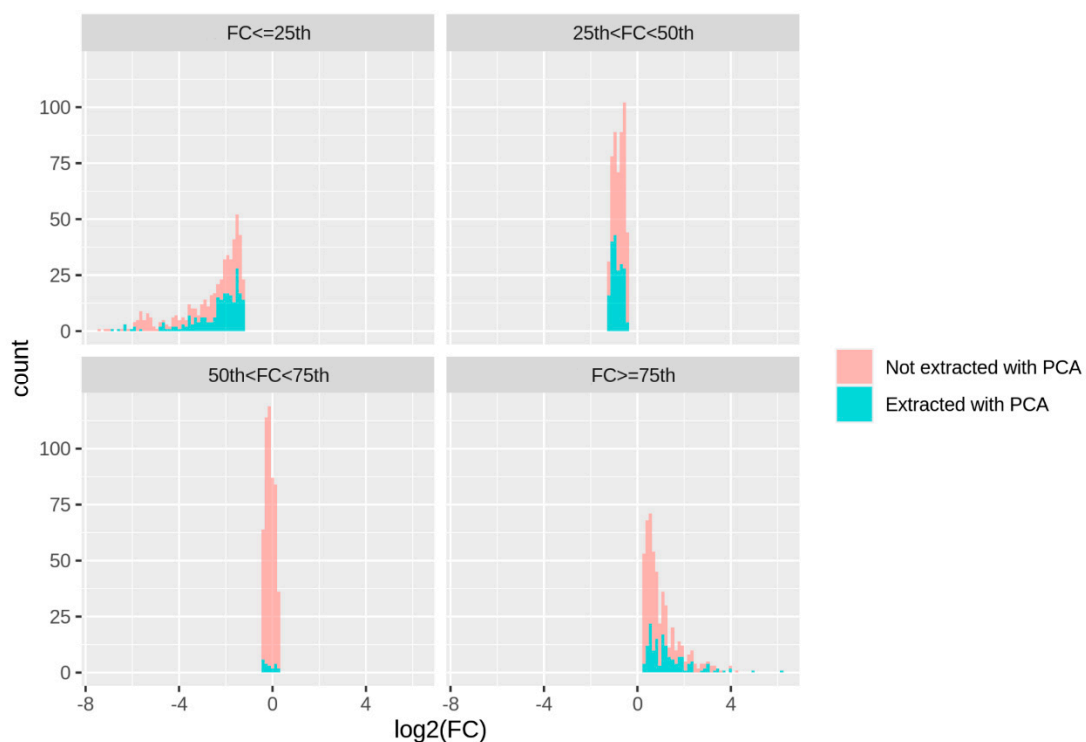

**Figure S2.** Distribution of lncRNAs fold change (FC) among quartiles. LncRNAs extracted with PCA are reported in blue, while lncRNAs not extracted with PCA are reported in red.

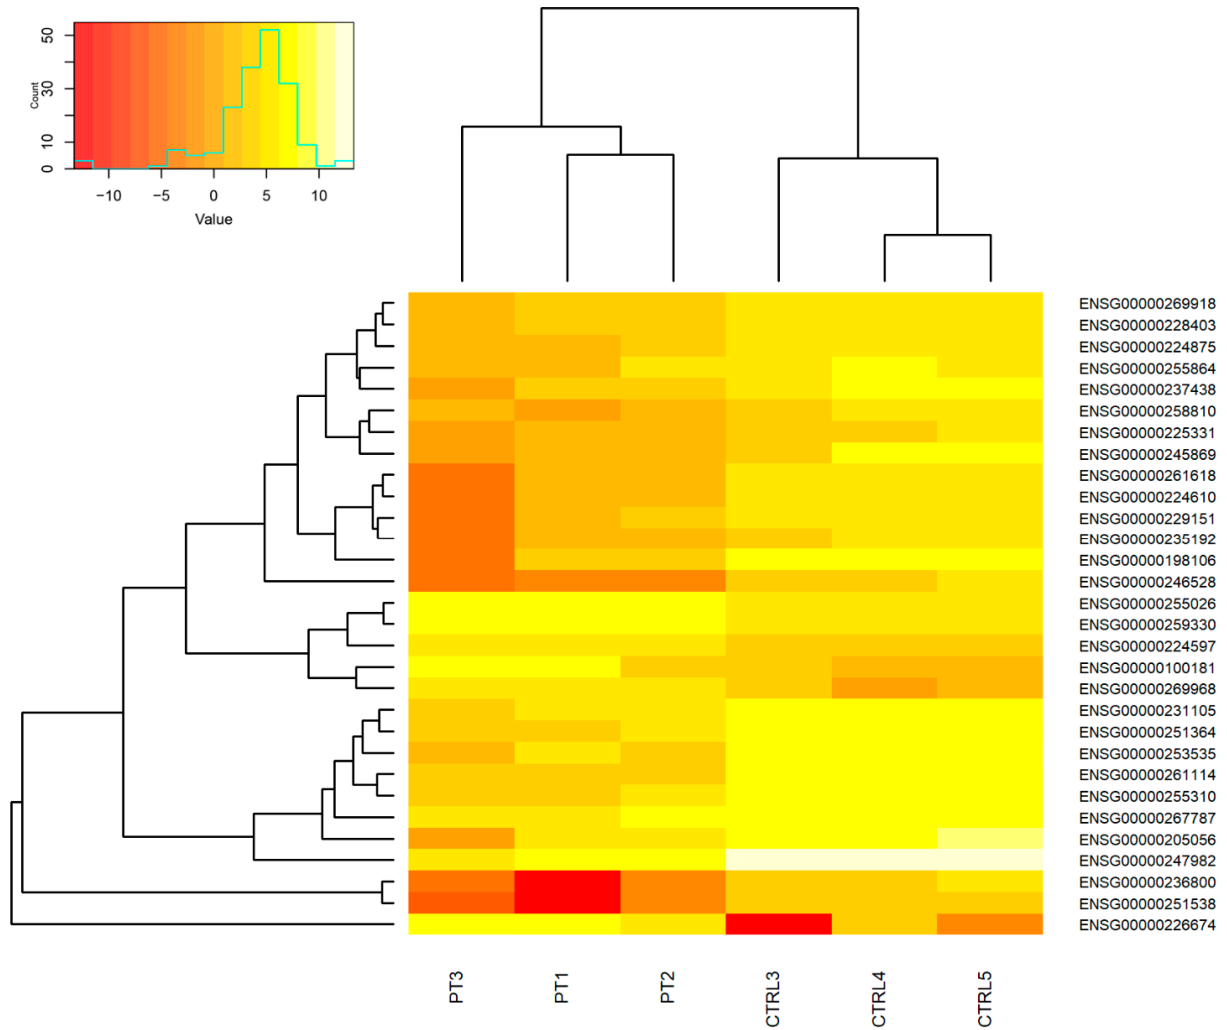

**Figure S3.** Gene expression profiling of 30 differential lncRNAs. Heatmap with hierarchical clustering shows the gene expression level, normalized by upper quartile (UQUA) approach, of 30 differential lncRNAs in B-ALL. Each column represents a subject, while each row represents the gene expression of a lncRNA. The color key indicates gene expression levels with red representing hypo-expression and yellow representing hyper-expression. The three B-ALL patients (PT1, PT2, and PT3) cluster together and are distinct from the 3 healthy subjects (CTRL3, CTRL4, CTRL5).

**Table S1.** The genomic position of the (not overlapping) lncRNA–mRNA pairs, according to the GhCh37.p13. Following each lncRNA or groups of lncRNAs are reported their co–expressed mRNAs.

| Ensembl ID      | Gene Name            | Chromosome | Gene Start (bp) | Gene End (bp) | Gene Type      | Correlation Direction |
|-----------------|----------------------|------------|-----------------|---------------|----------------|-----------------------|
| ENSG00000100181 | <i>TPTEP1</i>        | 22         | 17082777        | 17179632      | lincRNA        | Up-regulated          |
| ENSG00000067445 | <i>TRO</i>           | X          | 54946895        | 54957864      | protein coding | Up-regulated          |
| ENSG00000077097 | <i>TOP2B</i>         | 3          | 25639475        | 25706398      | protein coding | Up-regulated          |
| ENSG00000109501 | <i>WFS1</i>          | 4          | 6271576         | 6304992       | protein coding | Up-regulated          |
| ENSG00000119139 | <i>TJP2</i>          | 9          | 71736209        | 71870124      | protein coding | Up-regulated          |
| ENSG00000125844 | <i>RRBP1</i>         | 20         | 17594323        | 17662940      | protein coding | Up-regulated          |
| ENSG00000131773 | <i>KHDRBS3</i>       | 8          | 136469700       | 136668965     | protein coding | Up-regulated          |
| ENSG00000136868 | <i>SLC31A1</i>       | 9          | 115983808       | 116028674     | protein coding | Up-regulated          |
| ENSG00000198106 | <i>SNX29P2</i>       | 16         | 29262829        | 29519817      | lincRNA        | Down-regulated        |
| ENSG00000026559 | <i>KCNGB1</i>        | 20         | 49620193        | 49639666      | protein coding | Down-regulated        |
| ENSG00000082293 | <i>COL19A1</i>       | 6          | 70576463        | 70919679      | protein coding | Down-regulated        |
| ENSG00000104432 | <i>IL7</i>           | 8          | 79587978        | 79717758      | protein coding | Down-regulated        |
| ENSG00000104921 | <i>FCER2</i>         | 19         | 7753644         | 7767032       | protein coding | Down-regulated        |
| ENSG00000105738 | <i>SIPA1L3</i>       | 19         | 38397868        | 38699012      | protein coding | Down-regulated        |
| ENSG00000133985 | <i>TTC9</i>          | 14         | 71108504        | 71142077      | protein coding | Down-regulated        |
| ENSG00000134242 | <i>PTPN22</i>        | 1          | 114356433       | 114414381     | protein coding | Down-regulated        |
| ENSG00000135925 | <i>WNT10A</i>        | 2          | 219745085       | 219764303     | protein coding | Down-regulated        |
| ENSG00000143297 | <i>FCRL5</i>         | 1          | 157483167       | 157522310     | protein coding | Down-regulated        |
| ENSG00000147535 | <i>PPAPDC1B</i>      | 8          | 38120648        | 38126761      | protein coding | Down-regulated        |
| ENSG00000149564 | <i>ESAM</i>          | 11         | 124622026       | 124632186     | protein coding | Down-regulated        |
| ENSG00000154102 | <i>C16orf74</i>      | 16         | 85723690        | 85784735      | protein coding | Down-regulated        |
| ENSG00000158050 | <i>DUSP2</i>         | 2          | 96808905        | 96811179      | protein coding | Down-regulated        |
| ENSG00000163545 | <i>NUAK2</i>         | 1          | 205271187       | 205290883     | protein coding | Down-regulated        |
| ENSG00000164649 | <i>CDCA7L</i>        | 7          | 21940518        | 21985702      | protein coding | Down-regulated        |
| ENSG00000169507 | <i>SLC38A11</i>      | 2          | 165752696       | 165812035     | protein coding | Down-regulated        |
| ENSG00000187912 | <i>CLEC17A</i>       | 19         | 14693896        | 14721969      | protein coding | Down-regulated        |
| ENSG00000197705 | <i>KLHL14</i>        | 18         | 30252634        | 30353025      | protein coding | Down-regulated        |
| ENSG00000269404 | <i>SPIB</i>          | 19         | 50922195        | 50934570      | protein coding | Down-regulated        |
| ENSG00000205056 | <i>RP11–693/15.5</i> | 12         | 92860227        | 92885867      | lincRNA        | Down-regulated        |
| ENSG00000224875 | <i>AC083949.1</i>    | 2          | 42370378        | 42397441      | antisense      | Down-regulated        |
| ENSG00000235192 | <i>AC009495.2</i>    | 2          | 166651361       | 166666520     | lincRNA        | Down-regulated        |
| ENSG00000255310 | <i>AF131215.2</i>    | 8          | 10965298        | 10967236      | sense_intronic | Down-regulated        |
| ENSG00000269918 | <i>AF131215.9</i>    | 8          | 10962201        | 10964214      | sense_intronic | Down-regulated        |
| ENSG00000002587 | <i>HS3ST1</i>        | 4          | 11394774        | 11431389      | protein coding | Down-regulated        |
| ENSG00000028277 | <i>POU2F2</i>        | 19         | 42590263        | 42700737      | protein coding | Down-regulated        |
| ENSG00000071575 | <i>TRIB2</i>         | 2          | 12857015        | 12882860      | protein coding | Down-regulated        |
| ENSG00000079931 | <i>MOXD1</i>         | 6          | 132617194       | 132722684     | protein coding | Down-regulated        |
| ENSG00000110315 | <i>RNF141</i>        | 11         | 10533225        | 10562777      | protein coding | Down-regulated        |
| ENSG00000117009 | <i>KMO</i>           | 1          | 241695434       | 241758944     | protein coding | Down-regulated        |
| ENSG00000124256 | <i>ZBP1</i>          | 20         | 56178902        | 56195632      | protein coding | Down-regulated        |
| ENSG00000128268 | <i>MGAT3</i>         | 22         | 39853349        | 39888199      | protein coding | Down-regulated        |
| ENSG00000132185 | <i>FCRLA</i>         | 1          | 161676762       | 161684142     | protein coding | Down-regulated        |

| Ensembl ID      | Gene Name            | Chromosome | Gene Start (bp) | Gene End (bp) | Gene Type      | Correlation Direction |
|-----------------|----------------------|------------|-----------------|---------------|----------------|-----------------------|
| ENSG00000132589 | <i>FLOT2</i>         | 17         | 27206353        | 27224697      | protein coding | Down-regulated        |
| ENSG00000132704 | <i>FCRL2</i>         | 1          | 157715523       | 157746922     | protein coding | Down-regulated        |
| ENSG00000134121 | <i>CHL1</i>          | 3          | 238279          | 451090        | protein coding | Down-regulated        |
| ENSG00000136279 | <i>DBNL</i>          | 7          | 44084239        | 44109055      | protein coding | Down-regulated        |
| ENSG00000140009 | <i>ESR2</i>          | 14         | 64550950        | 64804830      | protein coding | Down-regulated        |
| ENSG00000146215 | <i>CRIP3</i>         | 6          | 43267448        | 43276535      | protein coding | Down-regulated        |
| ENSG00000157470 | <i>FAM81A</i>        | 15         | 59664892        | 59815748      | protein coding | Down-regulated        |
| ENSG00000161405 | <i>IKZF3</i>         | 17         | 37921198        | 38020441      | protein coding | Down-regulated        |
| ENSG00000162144 | <i>CYB561A3</i>      | 11         | 61116217        | 61129771      | protein coding | Down-regulated        |
| ENSG00000162894 | <i>FAIM3</i>         | 1          | 207077731       | 207096592     | protein coding | Down-regulated        |
| ENSG00000163534 | <i>FCRL1</i>         | 1          | 157764193       | 157789895     | protein coding | Down-regulated        |
| ENSG00000167723 | <i>TRPV3</i>         | 17         | 3413796         | 3461289       | protein coding | Down-regulated        |
| ENSG00000173559 | <i>NABP1</i>         | 2          | 192542794       | 192561385     | protein coding | Down-regulated        |
| ENSG00000182489 | <i>XKRX</i>          | X          | 100168431       | 100184422     | protein coding | Down-regulated        |
| ENSG00000182700 | <i>IGIP</i>          | 5          | 139505521       | 139508391     | protein coding | Down-regulated        |
| ENSG00000186265 | <i>BTLA</i>          | 3          | 112182815       | 112218408     | protein coding | Down-regulated        |
| ENSG00000197385 | <i>ZNF860</i>        | 3          | 32023263        | 32033120      | protein coding | Down-regulated        |
| ENSG00000203710 | <i>CR1</i>           | 1          | 207669492       | 207813992     | protein coding | Down-regulated        |
| ENSG00000204852 | <i>TCTN1</i>         | 12         | 111051832       | 111087235     | protein coding | Down-regulated        |
| ENSG00000214900 | <i>C14orf182</i>     | 14         | 50448430        | 50474238      | protein coding | Down-regulated        |
| ENSG00000248483 | <i>POU5F2</i>        | 5          | 93070508        | 93077343      | protein coding | Down-regulated        |
| ENSG00000224597 | <i>PTCHD3P1</i>      | 10         | 29698331        | 29776674      | antisense      | Down-regulated        |
| ENSG00000226674 | <i>TEX41</i>         | 2          | 145425534       | 145940216     | lincRNA        | Down-regulated        |
| ENSG00000115310 | <i>RTN4</i>          | 2          | 55199325        | 55339757      | protein coding | Down-regulated        |
| ENSG00000154127 | <i>UBASH3B</i>       | 11         | 122526383       | 122685181     | protein coding | Down-regulated        |
| ENSG00000182022 | <i>CHST15</i>        | 10         | 125767184       | 125853206     | protein coding | Down-regulated        |
| ENSG00000224610 | <i>RP11-265P11.1</i> | X          | 39085356        | 39159040      | lincRNA        | Down-regulated        |
| ENSG00000261618 | <i>RP11-79H23.3</i>  | 8          | 79749764        | 79752757      | lincRNA        | Down-regulated        |
| ENSG00000077238 | <i>ILAR</i>          | 16         | 27324989        | 27376099      | protein coding | Down-regulated        |
| ENSG00000101017 | <i>CD40</i>          | 20         | 44746911        | 44758502      | protein coding | Down-regulated        |
| ENSG00000109684 | <i>CLNK</i>          | 4          | 10488019        | 10686489      | protein coding | Down-regulated        |
| ENSG00000114315 | <i>HES1</i>          | 3          | 193853934       | 193856521     | protein coding | Down-regulated        |
| ENSG00000132849 | <i>INADL</i>         | 1          | 62208149        | 62629592      | protein coding | Down-regulated        |
| ENSG00000139266 | <i>MARCH9</i>        | 12         | 58148881        | 58154190      | protein coding | Down-regulated        |
| ENSG00000145685 | <i>LHFPL2</i>        | 5          | 77781038        | 78065844      | protein coding | Down-regulated        |
| ENSG00000151320 | <i>AKAP6</i>         | 14         | 32798479        | 33300567      | protein coding | Down-regulated        |
| ENSG00000155016 | <i>CYP2U1</i>        | 4          | 108852525       | 108874613     | protein coding | Down-regulated        |
| ENSG00000169116 | <i>PARM1</i>         | 4          | 75858305        | 75975325      | protein coding | Down-regulated        |
| ENSG00000169499 | <i>PLEKHA2</i>       | 8          | 38758753        | 38831428      | protein coding | Down-regulated        |
| ENSG00000186815 | <i>TPCN1</i>         | 12         | 113658855       | 113736390     | protein coding | Down-regulated        |
| ENSG00000205268 | <i>PDE7A</i>         | 8          | 66629745        | 66754557      | protein coding | Down-regulated        |
| ENSG00000225331 | <i>AP001055.6</i>    | 21         | 45578623        | 45579959      | lincRNA        | Down-regulated        |
| ENSG00000245869 | <i>RP11-158I9.5</i>  | 11         | 118756550       | 118758451     | antisense      | Down-regulated        |
| ENSG00000246528 | <i>RP11-159H10.3</i> | 8          | 70746346        | 70767206      | antisense      | Down-regulated        |
| ENSG00000253535 | <i>RP11-624C23.1</i> | 8          | 24153327        | 24769586      | antisense      | Down-regulated        |

| Ensembl ID      | Gene Name            | Chromosome | Gene Start (bp) | Gene End (bp) | Gene Type      | Correlation Direction |
|-----------------|----------------------|------------|-----------------|---------------|----------------|-----------------------|
| ENSG00000261114 | <i>RP11-325K4.2</i>  | 16         | 56974940        | 56975638      | sense_intronic | Down-regulated        |
| ENSG00000082512 | <i>TRAF5</i>         | 1          | 211499957       | 211548288     | protein coding | Down-regulated        |
| ENSG0000011846  | <i>GCNT2</i>         | 6          | 10492456        | 10629601      | protein coding | Down-regulated        |
| ENSG00000133740 | <i>E2F5</i>          | 8          | 86089460        | 86129387      | protein coding | Down-regulated        |
| ENSG00000138185 | <i>ENTPD1</i>        | 10         | 97471536        | 97637023      | protein coding | Down-regulated        |
| ENSG00000138867 | <i>GUCD1</i>         | 22         | 24936406        | 24951903      | protein coding | Down-regulated        |
| ENSG00000147548 | <i>WHSC1L1</i>       | 8          | 38127215        | 38239790      | protein coding | Down-regulated        |
| ENSG00000157483 | <i>MYO1E</i>         | 15         | 59427113        | 59665099      | protein coding | Down-regulated        |
| ENSG00000162066 | <i>AMDHD2</i>        | 16         | 2570358         | 2581423       | protein coding | Down-regulated        |
| ENSG00000174607 | <i>UGT8</i>          | 4          | 115519611       | 115599380     | protein coding | Down-regulated        |
| ENSG00000188177 | <i>ZC3H6</i>         | 2          | 113033171       | 113097640     | protein coding | Down-regulated        |
| ENSG00000228403 | <i>RP11-563N6.6</i>  | 10         | 50086067        | 50086694      | sense_intronic | Down-regulated        |
| ENSG00000229151 | <i>RP11-348F1.3</i>  | X          | 51099796        | 51139314      | antisense      | Down-regulated        |
| ENSG00000231105 | <i>RP5-1071N3.1</i>  | 1          | 21619783        | 21626267      | antisense      | Down-regulated        |
| ENSG00000247982 | <i>LINC00926</i>     | 15         | 57592563        | 57599959      | lincRNA        | Down-regulated        |
| ENSG00000251364 | <i>CTD-2516F10.2</i> | 11         | 7448497         | 7533746       | antisense      | Down-regulated        |
| ENSG00000267787 | <i>RP11-35G9.5</i>   | 18         | 55306687        | 55405276      | antisense      | Down-regulated        |
| ENSG00000066294 | <i>CD84</i>          | 1          | 160510885       | 160549306     | protein coding | Down-regulated        |
| ENSG00000073849 | <i>ST6GAL1</i>       | 3          | 186648274       | 186796341     | protein coding | Down-regulated        |
| ENSG00000074657 | <i>ZNF532</i>        | 18         | 56529832        | 56653712      | protein coding | Down-regulated        |
| ENSG00000079263 | <i>SP140</i>         | 2          | 231067826       | 231223762     | protein coding | Down-regulated        |
| ENSG00000100307 | <i>CBX7</i>          | 22         | 39516172        | 39548679      | protein coding | Down-regulated        |
| ENSG00000112320 | <i>SOBP</i>          | 6          | 107811162       | 107981357     | protein coding | Down-regulated        |
| ENSG00000123096 | <i>SSPN</i>          | 12         | 26274924        | 26452223      | protein coding | Down-regulated        |
| ENSG00000134954 | <i>ETS1</i>          | 11         | 128328656       | 128457453     | protein coding | Down-regulated        |
| ENSG00000143869 | <i>GDF7</i>          | 2          | 20866424        | 20873418      | protein coding | Down-regulated        |
| ENSG00000145416 | <i>MARCH1</i>        | 4          | 164445450       | 165305202     | protein coding | Down-regulated        |
| ENSG00000145779 | <i>TNFAIP8</i>       | 5          | 118604387       | 118735383     | protein coding | Down-regulated        |
| ENSG00000147457 | <i>CHMP7</i>         | 8          | 23101150        | 23119512      | protein coding | Down-regulated        |
| ENSG00000147912 | <i>FBXO10</i>        | 9          | 37510889        | 37588871      | protein coding | Down-regulated        |
| ENSG00000160991 | <i>ORAI2</i>         | 7          | 102073553       | 102097268     | protein coding | Down-regulated        |
| ENSG00000163568 | <i>AIM2</i>          | 1          | 159032274       | 159116886     | protein coding | Down-regulated        |
| ENSG00000170006 | <i>TMEM154</i>       | 4          | 153539784       | 153601317     | protein coding | Down-regulated        |
| ENSG00000172663 | <i>TMEM134</i>       | 11         | 67231824        | 67236743      | protein coding | Down-regulated        |
| ENSG00000229474 | <i>PATL2</i>         | 15         | 44957930        | 45003514      | protein coding | Down-regulated        |
| ENSG00000236800 | <i>RP11-534L6.2</i>  | 10         | 49872244        | 49880469      | lincRNA        | Down-regulated        |
| ENSG00000012124 | <i>CD22</i>          | 19         | 35810164        | 35838258      | protein coding | Down-regulated        |
| ENSG00000054219 | <i>LY75</i>          | 2          | 160628362       | 160761260     | protein coding | Down-regulated        |
| ENSG00000077232 | <i>DNAJC10</i>       | 2          | 183580999       | 183659191     | protein coding | Down-regulated        |
| ENSG00000111696 | <i>NT5DC3</i>        | 12         | 104164231       | 104234975     | protein coding | Down-regulated        |
| ENSG00000117090 | <i>SLAMF1</i>        | 1          | 160577890       | 160617085     | protein coding | Down-regulated        |
| ENSG00000133789 | <i>SWAP70</i>        | 11         | 9685624         | 9774538       | protein coding | Down-regulated        |
| ENSG00000134061 | <i>CD180</i>         | 5          | 66478103        | 66492627      | protein coding | Down-regulated        |
| ENSG00000135074 | <i>ADAM19</i>        | 5          | 156822542       | 157002783     | protein coding | Down-regulated        |
| ENSG00000142875 | <i>PRKACB</i>        | 1          | 84543745        | 84704181      | protein coding | Down-regulated        |

| Ensembl ID      | Gene Name     | Chromosome | Gene Start (bp) | Gene End (bp) | Gene Type      | Correlation Direction |
|-----------------|---------------|------------|-----------------|---------------|----------------|-----------------------|
| ENSG00000154511 | FAM69A        | 1          | 93307724        | 93427057      | protein coding | Down-regulated        |
| ENSG00000156711 | MAPK13        | 6          | 36095586        | 36107842      | protein coding | Down-regulated        |
| ENSG00000160602 | NEK8          | 17         | 27052915        | 27070473      | protein coding | Down-regulated        |
| ENSG00000163617 | KIAA1407      | 3          | 113682984       | 113775460     | protein coding | Down-regulated        |
| ENSG00000163644 | PPM1K         | 4          | 89178772        | 89205921      | protein coding | Down-regulated        |
| ENSG00000174123 | TLR10         | 4          | 38773860        | 38784611      | protein coding | Down-regulated        |
| ENSG00000174130 | TLR6          | 4          | 38825336        | 38858438      | protein coding | Down-regulated        |
| ENSG00000181143 | MUC16         | 19         | 8959520         | 9092018       | protein coding | Down-regulated        |
| ENSG00000185404 | SP140L        | 2          | 231191899       | 231268447     | protein coding | Down-regulated        |
| ENSG00000186088 | GSAP          | 7          | 76940068        | 77045717      | protein coding | Down-regulated        |
| ENSG00000214595 | EML6          | 2          | 54950636        | 55199157      | protein coding | Down-regulated        |
| ENSG00000235750 | KIAA0040      | 1          | 175126123       | 175162135     | protein coding | Down-regulated        |
| ENSG00000237438 | CECR7         | 22         | 17517460        | 17541715      | lincRNA        | Down-regulated        |
| ENSG0000042980  | ADAM28        | 8          | 24151553        | 24216531      | protein coding | Down-regulated        |
| ENSG0000082438  | COBLL1        | 2          | 165510134       | 165700189     | protein coding | Down-regulated        |
| ENSG00000100580 | TMED8         | 14         | 77801364        | 77843452      | protein coding | Down-regulated        |
| ENSG00000123095 | BHLHE41       | 12         | 26272959        | 26278060      | protein coding | Down-regulated        |
| ENSG00000149292 | TTC12         | 11         | 113185251       | 113254266     | protein coding | Down-regulated        |
| ENSG00000161929 | SCIMP         | 17         | 5112256         | 5138155       | protein coding | Down-regulated        |
| ENSG00000165025 | SYK           | 9          | 93564069        | 93660831      | protein coding | Down-regulated        |
| ENSG00000251538 | RP11-166A12.1 | 5          | 121964647       | 122066380     | lincRNA        | Down-regulated        |
| ENSG00000124357 | NAGK          | 2          | 71291474        | 71306935      | protein coding | Down-regulated        |
| ENSG00000124374 | PAIP2B        | 2          | 71409869        | 71454213      | protein coding | Down-regulated        |
| ENSG00000163683 | SMIM14        | 4          | 39547950        | 39640710      | protein coding | Down-regulated        |
| ENSG00000185666 | SYN3          | 22         | 32908539        | 33454358      | protein coding | Down-regulated        |
| ENSG00000255026 | RP11-326C3.2  | 11         | 287305          | 288987        | antisense      | Up-regulated          |
| ENSG0000018510  | AGPS          | 2          | 178257372       | 178408564     | protein coding | Up-regulated          |
| ENSG00000033327 | GAB2          | 11         | 77926343        | 78129394      | protein coding | Up-regulated          |
| ENSG00000052795 | FNIP2         | 4          | 159690290       | 159829201     | protein coding | Up-regulated          |
| ENSG00000106069 | CHN2          | 7          | 29161890        | 29553944      | protein coding | Up-regulated          |
| ENSG00000108219 | TSPAN14       | 10         | 82213922        | 82292879      | protein coding | Up-regulated          |
| ENSG00000109113 | RAB34         | 17         | 27041299        | 27045447      | protein coding | Up-regulated          |
| ENSG00000113749 | HRH2          | 5          | 175085033       | 175113245     | protein coding | Up-regulated          |
| ENSG00000115183 | TANC1         | 2          | 159825146       | 160089170     | protein coding | Up-regulated          |
| ENSG00000117016 | RIMS3         | 1          | 41086351        | 41131329      | protein coding | Up-regulated          |
| ENSG00000135404 | CD63          | 12         | 56119107        | 56123491      | protein coding | Up-regulated          |
| ENSG00000135821 | GLUL          | 1          | 182350839       | 182361341     | protein coding | Up-regulated          |
| ENSG00000143847 | PPFIA4        | 1          | 202995626       | 203047868     | protein coding | Up-regulated          |
| ENSG00000152495 | CAMK4         | 5          | 110559351       | 110830584     | protein coding | Up-regulated          |
| ENSG00000165801 | ARHGEF40      | 14         | 21538429        | 21558399      | protein coding | Up-regulated          |
| ENSG00000169136 | ATF5          | 19         | 50431959        | 50437192      | protein coding | Up-regulated          |
| ENSG00000177602 | GSG2          | 17         | 3627211         | 3630067       | protein coding | Up-regulated          |
| ENSG00000178404 | DDC8          | 17         | 76866992        | 76899299      | protein coding | Up-regulated          |
| ENSG00000182253 | SYNM          | 15         | 99638420        | 99675798      | protein coding | Up-regulated          |
| ENSG00000182718 | ANXA2         | 15         | 60639333        | 60695082      | protein coding | Up-regulated          |

| Ensembl ID      | Gene Name           | Chromosome | Gene Start (bp) | Gene End (bp) | Gene Type      | Correlation Direction |
|-----------------|---------------------|------------|-----------------|---------------|----------------|-----------------------|
| ENSG00000198648 | <i>STK39</i>        | 2          | 168810530       | 169104651     | protein coding | Up-regulated          |
| ENSG00000255864 | <i>RP11-444D3.1</i> | 12         | 24366190        | 24715524      | lincRNA        | Down-regulated        |
| ENSG00000075035 | <i>WSCD2</i>        | 12         | 108523248       | 108644314     | protein coding | Down-regulated        |
| ENSG00000078589 | <i>P2RY10</i>       | X          | 78200829        | 78217451      | protein coding | Down-regulated        |
| ENSG00000080007 | <i>DDX43</i>        | 6          | 74104471        | 74127292      | protein coding | Down-regulated        |
| ENSG00000081052 | <i>COL4A4</i>       | 2          | 227867427       | 228028829     | protein coding | Down-regulated        |
| ENSG00000105492 | <i>SIGLEC6</i>      | 19         | 52022779        | 52035110      | protein coding | Down-regulated        |
| ENSG00000115825 | <i>PRKD3</i>        | 2          | 37477645        | 37551951      | protein coding | Down-regulated        |
| ENSG00000118432 | <i>CNR1</i>         | 6          | 88849583        | 88876078      | protein coding | Down-regulated        |
| ENSG00000124429 | <i>POF1B</i>        | X          | 84532402        | 84634748      | protein coding | Down-regulated        |
| ENSG00000134460 | <i>IL2RA</i>        | 10         | 6052652         | 6104288       | protein coding | Down-regulated        |
| ENSG00000134532 | <i>SOX5</i>         | 12         | 23682440        | 24103966      | protein coding | Down-regulated        |
| ENSG00000136997 | <i>MYC</i>          | 8          | 128747680       | 128753674     | protein coding | Down-regulated        |
| ENSG00000162551 | <i>ALPL</i>         | 1          | 21835858        | 21904905      | protein coding | Down-regulated        |
| ENSG00000163219 | <i>ARHGAP25</i>     | 2          | 68906733        | 69053965      | protein coding | Down-regulated        |
| ENSG00000163637 | <i>PRICKLE2</i>     | 3          | 64079543        | 64431152      | protein coding | Down-regulated        |
| ENSG00000164574 | <i>GALNT10</i>      | 5          | 153570290       | 153800544     | protein coding | Down-regulated        |
| ENSG00000165521 | <i>EML5</i>         | 14         | 89078775        | 89259096      | protein coding | Down-regulated        |
| ENSG00000170456 | <i>DENND5B</i>      | 12         | 31535157        | 31744031      | protein coding | Down-regulated        |
| ENSG00000177311 | <i>ZBTB38</i>       | 3          | 141043055       | 141168634     | protein coding | Down-regulated        |
| ENSG00000182240 | <i>BACE2</i>        | 21         | 42539728        | 42654445      | protein coding | Down-regulated        |
| ENSG00000183091 | <i>NEB</i>          | 2          | 152341850       | 152591001     | protein coding | Down-regulated        |
| ENSG00000187510 | <i>PLEKHG7</i>      | 12         | 93115281        | 93166231      | protein coding | Down-regulated        |
| ENSG00000258810 | <i>RP11-219E7.1</i> | 14         | 21252047        | 21252452      | antisense      | Down-regulated        |
| ENSG00000035720 | <i>STAP1</i>        | 4          | 68424446        | 68473055      | protein coding | Down-regulated        |
| ENSG00000122224 | <i>LY9</i>          | 1          | 160765864       | 160798051     | protein coding | Down-regulated        |
| ENSG00000153814 | <i>JAZF1</i>        | 7          | 27870192        | 28220362      | protein coding | Down-regulated        |
| ENSG00000172869 | <i>DMXL1</i>        | 5          | 118373467       | 118584833     | protein coding | Down-regulated        |
| ENSG00000259330 | <i>LINC00984</i>    | 15         | 40617417        | 40618916      | antisense      | Up-regulated          |
| ENSG00000269968 | <i>RP5-940J5.9</i>  | 12         | 6646960         | 6647536       | antisense      | Up-regulated          |
| ENSG00000008256 | <i>CYTH3</i>        | 7          | 6201407         | 6312275       | protein coding | Up-regulated          |
| ENSG00000065534 | <i>MYLK</i>         | 3          | 123328896       | 123603178     | protein coding | Up-regulated          |
| ENSG00000115355 | <i>CCDC88A</i>      | 2          | 55514978        | 55647057      | protein coding | Up-regulated          |
| ENSG00000122779 | <i>TRIM24</i>       | 7          | 138145079       | 138274738     | protein coding | Up-regulated          |
| ENSG00000132846 | <i>ZBED3</i>        | 5          | 76367897        | 76383148      | protein coding | Up-regulated          |
| ENSG00000137266 | <i>SLC22A23</i>     | 6          | 3269196         | 3457256       | protein coding | Up-regulated          |
| ENSG00000140836 | <i>ZFHX3</i>        | 16         | 72816784        | 73093597      | protein coding | Up-regulated          |
| ENSG00000161638 | <i>ITGA5</i>        | 12         | 54789045        | 54813244      | protein coding | Up-regulated          |
| ENSG00000165512 | <i>ZNF22</i>        | 10         | 45495923        | 45500774      | protein coding | Up-regulated          |
| ENSG00000168268 | <i>NT5DC2</i>       | 3          | 52558386        | 52569070      | protein coding | Up-regulated          |
| ENSG00000170340 | <i>B3GNT2</i>       | 2          | 62423248        | 62451866      | protein coding | Up-regulated          |
| ENSG00000178695 | <i>KCTD12</i>       | 13         | 77454312        | 77460540      | protein coding | Up-regulated          |
| ENSG00000179820 | <i>MYADM</i>        | 19         | 54369477        | 54379691      | protein coding | Up-regulated          |
| ENSG00000198369 | <i>SPRED2</i>       | 2          | 65537985        | 65659771      | protein coding | Up-regulated          |
| ENSG00000206560 | <i>ANKRD28</i>      | 3          | 15708743        | 15901278      | protein coding | Up-regulated          |



**Table S2.** Functional roles of the 30 lncRNAs based on their perfect correlations (lncRNA–mRNA) with mRNAs membership of the 4 KEGG disease associated pathways such as “Hematopoietic cell lineage”, “Pathways in cancer”, “Acute myeloid leukaemia, AML”, “Chronic myeloid leukaemia, CML”. Only lncRNAs grouped in clusters share the same co-expressed mRNAs.

| Cluster | lncRNA symbol<br>(GRCh37.p13)/(GRCh38.p13) | Ensembl ID      | n° of co-expressed<br>mRNAs | mRNAs membership of KEGG disease associated pathways <sup>a</sup><br>(gene symbol)                                                                                                                                                                                              |
|---------|--------------------------------------------|-----------------|-----------------------------|---------------------------------------------------------------------------------------------------------------------------------------------------------------------------------------------------------------------------------------------------------------------------------|
| 1       | <i>LINC02397/LINC02397</i>                 | ENSG00000205056 | 30                          | 1/30 Hematopoietic: ENSG00000203710 ( <i>CR1</i> )<br>1/30 Pathways in cancer: ENSG00000140009 ( <i>ESR2</i> )                                                                                                                                                                  |
|         | <i>EML4-AS1/EML4-AS1</i>                   | ENSG00000224875 |                             |                                                                                                                                                                                                                                                                                 |
|         | <i>AC0094952/AC009495.3</i>                | ENSG00000235192 |                             |                                                                                                                                                                                                                                                                                 |
|         | <i>AF1312152/AF131215.5</i>                | ENSG00000255310 |                             |                                                                                                                                                                                                                                                                                 |
|         | <i>AF1312159/AF131215.6</i>                | ENSG00000269918 |                             |                                                                                                                                                                                                                                                                                 |
| –       | <i>RP11_534L62/AC068898.1</i>              | ENSG00000236800 | 21                          | 1/21 Hematopoietic: ENSG00000012124 ( <i>CD22</i> )<br>1/21 Pathways in cancer: ENSG00000142875 ( <i>PRKACB</i> )                                                                                                                                                               |
| –       | <i>RP11-444D3.1</i>                        | ENSG00000255864 | 21                          | 1/21 Hematopoietic: ENSG00000134460 ( <i>IL2RA</i> )<br>3/21 Pathways in cancer: ENSG00000142875 ( <i>COL4A4</i> ); ENSG00000134460 ( <i>IL2RA</i> );<br>ENSG00000136997 ( <i>MYC</i> )<br>1/21 AML: ENSG00000136997 ( <i>MYC</i> )<br>1/21 CML: ENSG00000136997 ( <i>MYC</i> ) |
| –       | <i>RP11_326C32/AC136475.3</i>              | ENSG00000255026 | 20                          | 1/20 CML: ENSG0000033327 ( <i>GAB2</i> )                                                                                                                                                                                                                                        |
| –       | <i>SNX29P2/AC025279.1</i>                  | ENSG00000198106 | 19                          | 2/19 Hematopoietic: ENSG00000104432 ( <i>IL7</i> ); ENSG0000010492 ( <i>FCER2</i> )<br>2/19 Pathways in cancer: ENSG00000104432 ( <i>IL7</i> ); ENSG00000135925 ( <i>WNT10A</i> )                                                                                               |
| 2       | <i>RP11_563N66/AC035139.1</i>              | ENSG00000228403 | 18                          | 1/18 Pathways in cancer: ENSG00000134954 ( <i>ETS1</i> )                                                                                                                                                                                                                        |
|         | <i>RP11_348F13/AC233976.1</i>              | ENSG00000229151 |                             |                                                                                                                                                                                                                                                                                 |
|         | <i>ECE1-AS1/ECE1-AS1</i>                   | ENSG00000231105 |                             |                                                                                                                                                                                                                                                                                 |
|         | <i>LINC00926/LINC00926</i>                 | ENSG00000247982 |                             |                                                                                                                                                                                                                                                                                 |
|         | <i>LOC100506258/AC107884.1</i>             | ENSG00000251364 |                             |                                                                                                                                                                                                                                                                                 |
| 3       | <i>RP11_35G95/AC027097.2</i>               | ENSG00000267787 | 15                          | 1/15 Hematopoietic: ENSG00000161638 ( <i>ITGA5</i> )                                                                                                                                                                                                                            |
|         | <i>RP5_940J59/AC006064.4</i>               | ENSG00000269968 |                             |                                                                                                                                                                                                                                                                                 |
|         | <i>LINC00984/INAFM2</i>                    | ENSG00000259330 |                             |                                                                                                                                                                                                                                                                                 |
| 4       | <i>RP11_265P111/AC108879.1</i>             | ENSG00000224610 | 13                          | 1/13 Hematopoietic: ENSG00000077238 ( <i>IL4R</i> )<br>2/13 Pathways in cancer: ENSG00000077238 ( <i>IL4R</i> ); ENSG00000114315 ( <i>HES1</i> )                                                                                                                                |
|         | <i>RP11-79H23.3/LINC02605</i>              | ENSG00000261618 |                             |                                                                                                                                                                                                                                                                                 |
| 5       | <i>AP001055.6/LINC01678</i>                | ENSG00000225331 | 10                          | 1/10 Pathways in cancer: ENSG00000082512 ( <i>TRAF5</i> )                                                                                                                                                                                                                       |
|         | <i>RP11-158I9.5/AP004609.3</i>             | ENSG00000245869 |                             |                                                                                                                                                                                                                                                                                 |
|         | <i>RP11-159H10.3/AC079089.1</i>            | ENSG00000246528 |                             |                                                                                                                                                                                                                                                                                 |
|         | <i>LOC101929294/AC120193.1</i>             | ENSG00000253535 |                             |                                                                                                                                                                                                                                                                                 |
| –       | <i>RP11_325K42/AC012181.1</i>              | ENSG00000261114 | 7                           | none involved in Hematopoietic, Pathways in cancer, AML or CML                                                                                                                                                                                                                  |
| –       | <i>TPTEP1/TPTEP1</i>                       | ENSG00000100181 | 7                           | none involved in Hematopoietic, Pathways in cancer, AML or CML                                                                                                                                                                                                                  |
| –       | <i>CECR7/CECR7</i>                         | ENSG00000237438 | 7                           | none involved in Hematopoietic, Pathways in cancer, AML or CML                                                                                                                                                                                                                  |
| –       | <i>RP11-166A12.1/LINC02201</i>             | ENSG00000251538 | 4                           | none involved in Hematopoietic, Pathways in cancer, AML or CML                                                                                                                                                                                                                  |
| –       | <i>RP11_219E71/AL133371.2</i>              | ENSG00000258810 | 4                           | none involved in Hematopoietic, Pathways in cancer, AML or CML                                                                                                                                                                                                                  |

| Cluster | lncRNA symbol<br>(GRCh37.p13)/(GRCh38.p13) | Ensembl ID      | n° of co-expressed<br>mRNAs | mRNAs membership of KEGG disease associated pathways <sup>a</sup><br>(gene symbol) |
|---------|--------------------------------------------|-----------------|-----------------------------|------------------------------------------------------------------------------------|
| –       | <i>PTCHD3P1/SVIL-AS1</i>                   | ENSG00000224597 | 3                           | none involved in Hematopoietic, Pathways in cancer, AML or CML                     |
| –       | <i>TEX41/TEX41</i>                         | ENSG00000226674 | 3                           | none involved in Hematopoietic, Pathways in cancer, AML or CML                     |

<sup>a</sup> KEGG disease associated pathways term id KEGG:04640, KEGG:05200, KEGG:05221 and KEGG:05220 from the full G:profiler enrichment analysis, padj, Benjamini–Hochberg method FDR<0.05. See Materials and Methods.

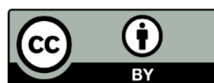

© 2020 by the authors. Licensee MDPI, Basel, Switzerland. This article is an open access article distributed under the terms and conditions of the Creative Commons Attribution (CC BY) license (<http://creativecommons.org/licenses/by/4.0/>).
